# Supplementary material
Source: Springer Nature journal article supplement (https://www.springermedizin.de/resource/supplementary/13023_2006_24_MOESM4_ESM.pdf/9641476)

**Figure 4: Prostaglandin E-M in the urine of patient #3 during meloxicam treatment**

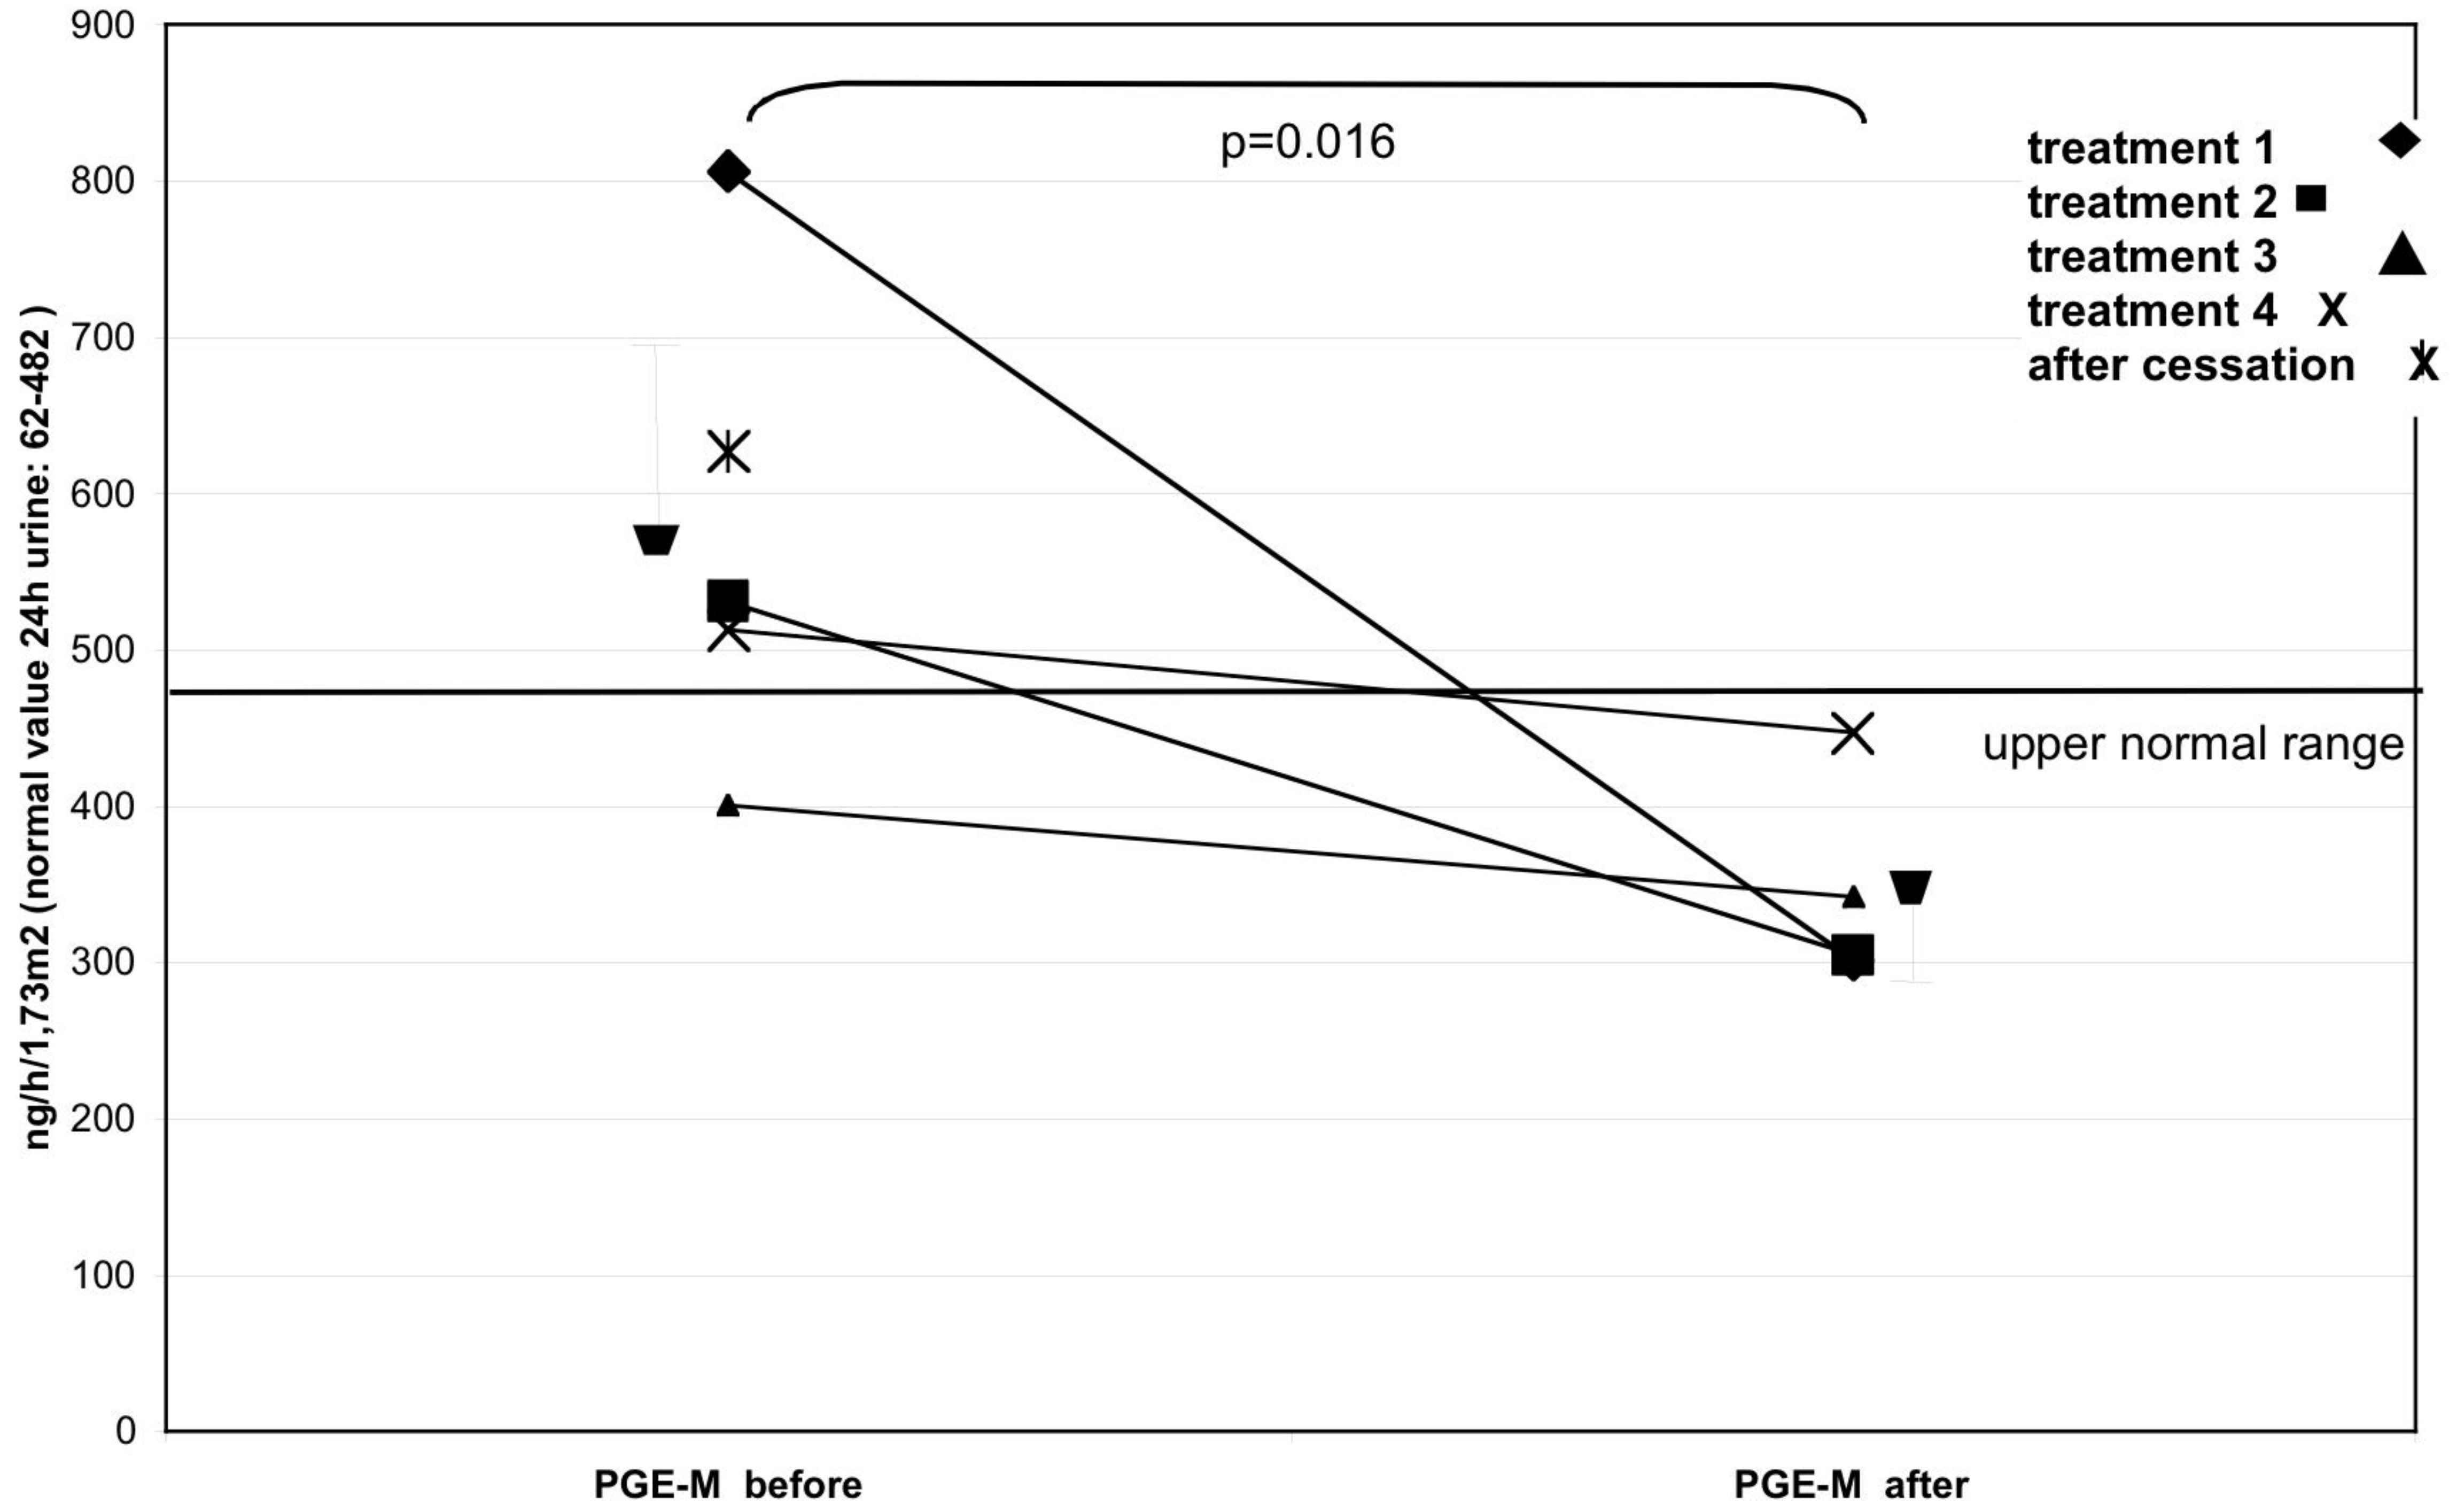

Supplement: MOESM4 [file 9641476]
